# Supplementary material
Source: Elsevier journal article supplement (https://www.sciencedirect.com/science/article/pii/S2173578615001080)
Supplement: mmc1 [file S2173578615001080:mmc1.docx]

Investigadores participantes en el estudio EPICAV

**Andalucía:**

Hospital Reina Sofía. Córdoba

– Dra. María José Requena

– Dr. Francisco Anglada

– Dr. Alejandro González Alfaro

Hospital Virgen de las Nieves. Granada

– Dr. Manrique Pascual Geler

– Dr. Francisco Javier Vicente Prados

- Jose Manuel Cozar

Hospital Carlos Haya. Málaga

– Dr. J. Ángel Gómez Pascual

– Dr. Pedro Morales Jiménez y

– Dr. Víctor Baena González

Hospital Universitario Virgen del Rocío. Sevilla

– Dr. Rafael Antonio Medina

Hospital Universitario Virgen Macarena. Sevilla

– Dr. J. Castiñeiras Fernández

– Dr. José A. Montaño Pérez

– Dr. Rubén Campanario Pérez

– Dr. José L. Moyano Calvo

**Aragón:**

Hospital Clínico Universitario Lozano Blesa. Zaragoza

– Dr. Jorge Subirá Ríos

– Dr. Jesús García-Magariño Alonso

– Dra. Victoria Capapé

– Dra. María Mata

– Dra. Isabel Chávez

– DR. Javier Elizalde

Hospital Royo Villanova . Zaragoza

– Dr. Carlos Rioja Sanz.

– Dr. Jaume Pelegrí Gabarró.

– Dra. Ingrid Guiote Partido.

**Asturias:**

Hospital Universitario Central de Asturias. Oviedo

– Dr. Miguel Hevia Suárez

– Dra. Beatriz Lobo Rodríguez

– Dr. Samuel Méndez Ramírez

– Dr. Jorge González Suárez

**Cantabria:**

Hospital Universitario Marqués de Valdecilla. Santander

– Dra. Emma Hidalgo

– Dr. David Truan Cacho

**Castilla La Mancha:**

Hospital Virgen de la Salud. Toledo

– Dr. Antonio Gómez Rodríguez

– Dr. Eduardo Bolufer Moragues

– Dr. Nathanael García Bethancourt

**Castilla Y León:**

Hospital Universitario Río Hortega. Valladolid

– Dr. José Heriberto Amón Sesmero

– Dr. Francisco García Belandria

**Cataluña:**

Hospital Clínic de Barcelona. Barcelona

– Dra. María José Ribal Caparrós

– Dra. Marta Piqueras Bartolomé

– Dra. Meritxell Pérez

Hospital Vall d´Hebron. Barcelona

– Dr. Fernando Lozano Palacio

– Dra. Anna Orsola de los Santos

– Dr. Christian Isalt Lemonche

Fundación Puigvert. Barcelona

– Dr. Joan Palou

– Dr. Humberto Villavicencio

– Dr. Oscar Rodríguez

– Dr. José María Gaya

**Comunidad Valenciana:**

Hospital General Universitario de Valencia. Valencia

– Dra. María Macarena Ramos de Campo

Hospital Doctor Peset. Valencia

– Dr. Alfredo Bohorquez Barrientos

– Dr. Jorge Planelles Gomez

– Dra. Lorena Bermell Marco.

– Dra. Maria Angeles Martinez.

– Dr. Francisco Bon Beneto.

**Extremadura:**

Hospital de Mérida. Badajoz

– Dr. Juan Luis Parra Escobar

– Dra. Manuela Pacheco

**Galicia:**

Complexo Hospitalario Universitario A Coruña. A Coruña

– Dr. Venancio Chantada Abal

– Dra. Paula Portela Pereira

– Dr. Juan Andrés González Dacal

**Illes Balears:**

Hospital Son Espases. Mallorca

– Dr. Pedro Pizá Reus

– Dr. Valentí Vidaña Tubau

**Islas Canarias:**

Hospital Universitario de Canarias. Sta. Cruz de Tenerife

– Dr. Tomás Concepción Masip

– Dra. Ana Plata Bello

**Madrid:**

Hospital Clínico San Carlos. Madrid

– Dr. Jesús Moreno Sierra

– Dra. Sofía López de Alda Bauluz

– Dra. María Eugenia León Rueda

– Dr. Marco Ciappara Paniagua

– Dr. César Chávez Roa

– Dr. Freddy Covaria Acuña

– Dr. Héctor Garde García

– Dr. Eduardo Useros Rodríguez

– Dr. Enrique Redondo González

Hospital Puerta de Hierro. Madrid

– Dr. Claudio Martínez Ballesteros

– Dr. Joaquín Carballido Rodríguez

Hospital Gregorio Marañón. Madrid

– Dr. Carlos Hernández Fernández

– Dra. Elena Rodríguez Fernández

– Dr. Javier Piñero

– Dr. Juan Aragón

Hospital 12 de Octubre. Madrid

– Dr. Felipe Villacampa Aubá

– Dr. Federico de la Rosa Kehrmann

– Dra. Lucía García González

– Dra. Estíbaliz Jiménez Alcaide

**Región de Murcia:**

Hospital Morales Meseguer. Murcia

– Dr. Tomás Fernández Aparicio

– Dra. Mari Carmen Cano García

– Dr. Benardino Miañana

**País Vasco:**

Hospital de Basurto. Bilbao

– Dr. Miguel Unda Urzaiz

– Dra. Nerea Senarriaga Ruiz de la Illa

– Dra. Ana Loizaga Iriarte
